# Supplementary material
Source: publisher site journal article supplement (https://www.dovepress.com/article/295835)
Supplement: Supplementary file 1 [file get_supplementary_file.php]

**Supplementary file for:**

Treatment of COPD with long-acting bronchodilators: association between early and longer-term clinically important improvement

Claus F. Vogelmeier, Ian P. Naya, François Maltais, Leif Bjermer, Edward M. Kerwin, Lee Tombs, Paul W. Jones, Chris Compton, David A. Lipson, Isabelle H. Boucot

**Corresponding author:** Claus F. Vogelmeier

**Email:** [claus.vogelmeier@med.uni-marburg.de](mailto:claus.vogelmeier@med.uni-marburg.de)

**Supplementary Figure 1: Combinations of PRO responses at Week 4**


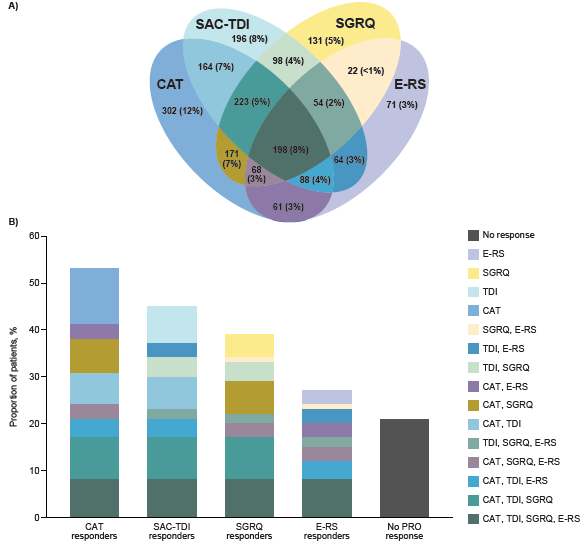


CAT, COPD Assessment Test; COPD, chronic obstructive pulmonary disease; E-RS, Evaluating Respiratory Symptoms:COPD; PRO, patient-reported outcome; SAC-TDI, self-administered computerized-Transition Dyspnea Index; SGRQ, St George’s Respiratory Questionnaire.

**Supplementary Figure 2: Proportion of patients with a moderate/severe exacerbation event after Day 30 by: (A) achievement of a CII at Week 4 and (B) the number of PRO responses at Week 4**


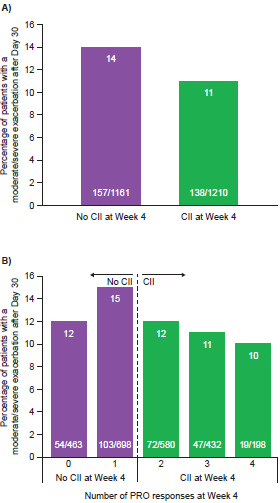


CII, clinically important improvement; PRO, patient-reported outcome.

**Supplementary File 1. IEC/IRB committees that approved the EMAX trial**

| Comité de Ética en Investigación. INAER, Arenales 3146 1° B, Ciudad Autónoma de Buenos Aires, C1425BEN, Argentina |
| --- |
| CEICI, Italia 424, Rosario, Santa Fe, 2000, Argentina |
| CEMER, Esmeralda 1550, Florida, Buenos Aires, 1602, Argentina |
| CECIC Comité de Ética de CER Investigaciones Clínicas, Vicente Lopez 1441, Quilmes, Buenos Aires, 1878, Argentina |
| Comité Independiente de ética Fundación Rusculleda, Avenida Colón 2057, Córdoba, Córdoba, X5003DCE, Argentina |
| Framingham Centro Médico, Calle 9 Número 431, La Plata, Buenos Aires, B1902COS, Argentina |
| Comité Independiente de ética para ensayos en Farmacología Clínica del centro Médico Dra. De Salvo, Avenida Cabildo 1536 5° B, Ciudad Autónoma de Buenos Aires, Buenos Aires, C1426ABP, Argentina |
| Instituto Argentino de Investigación Neurológica, Uruguay 824 1st floor, Ciudad Autónoma de Buenis Aires, C1015ABR, Argentina |
| FUMELIT, Av. Gdor. Freyre 3074, Santa Fe, 3000, Argentina |
| CIDEA, 3er Cuerpo - 2do Subsuelo, Paraguay 2035, Ciudad Autónoma de Buenos Aires, C1121ABE, Argentina |
| Comite de Etica de San Isidro-CESI, Avenue Libertador 169581, San Isidro, Buenos Aires, CP 1643, Argentina |
| Comité de ética para la investigación Clínica Fundación Dr. J.R. Villavicencio, Alvear 854, Rosario, Santa Fe, 2000QGB, Argentina |
| Comité de Etica Iniciativa y Reflexión Bioética Rosario, Rioja 2926, Rosario, S2002OJN, Argentina |
| CESIM, Urquiza 646, Santa Rosa, 6300, Argentina |
| Instituto de Investigación Clínica de Mar del Plata, Av. Colón 3364 PB, Mar del Plata, Buenos Aires, B7600FZN, Argentina |
| Centro de Osteopatías Médicas, Azcuénaga 1860, Buenos Aires, C1128AAF, Argentina |
| Comité de Etica en Investigación Clínica - CEIC, Larrea 1381, Ciudad Autónoma de Buenos Aires, Buenos Aires, C1117ABK, Argentina |
| Comitó de Etica en Investigación, Instituto Ave Pulmo, Carlos M. Alvear 3345, Mar del Plata,  Buenos Aires, B7602DCK, Argentina |
| Bellberry Limited, 129 Glen Osmond Rd, Eastwood, South Australia, 5063, Australia |
| INSTITUTIONAL REVIEW BOARD Services, Suite 300, 372 Hollandview Trail, Aurora, Ontario, L4G 0A5, Canada |
| Comité d'éthique de la recherche de l'Institut universitaire de cardiologie et de pneumologie de Qué, 2725 Chemin Ste-Foy, Quebec, G1V 4G5, Canada |
| CHU Pontachaillou, Comité de Protection des Personnes, 9 Avenue de la Bataille Flandres-Dunkerque Mai 1940, Rennes, 35000, France |
| Ethik-Kommission der Landesaerztekammer Hessen, Im Vogelsgesang 3, Frankfurt, Hessen, 60488, Germany |
| Comitato Etico IRCCS Istituto Tumori "G.Paolo II", V.le Orazio Flacco 65, Bari, Puglia, 70124, Italy |
| Comitato Etico Campania Nord c/o A.O. San Giuseppe Moscati di Avellino, Segreteria Scientifico- Amministrativa, Città Ospedaliera -Pal. Uffici, Contrada Amoretta, Avellino, Campania, Italy |
| Com. Etico Reg. Toscano "Area Vasta Nord Ovest", Segreteria Scientifico-Amministrativa -Azienda Ospedaliero-Universitaria Pisana, Via Roma, 67, Pisa, Toscana, 56126, Italy |
| Comitato Etico Palermo 1, c/o Azienda Ospedaliera Universitaria Policlinico "Paolo Giaccone", Segreteria Scientifico-Amministrativa, Via del Vespro 129, Palermo, Sicilia, 90127, Italy |
| Comitato Etico Univ. Studi Campania L.Vanvitelli – AOU L.Vanvitelli - AORN Osp. dei Colli, Sede AORN Ospedali dei Colli, Via Leonardo Bianchi snc, Napoli, Campania, 80131, Italy |
| C.E.ROM. Comitato Etico della Romagna, c/o Ist. Scientifico Romagnolo per lo Studio e la Cura dei Tumori, IRST - IRCCS Srl, Via Piero Maroncelli 40, Meldola (FC), Emilia-Romagna, 47014, Italy |
| Comitato Etico Unico Regionale del Friuli Venezia Giulia, Segreteria Tecnico-Scientifica c/o Dir. Scientifica, IRCCS CRO di Aviano, Via Gallini, 2, Aviano (PN), Friuli-Venezia-Giulia, 33081, Italy |
| Comitato Etico dell'Area Vasta Emilia Nord, Via Vertoiba, 10A, Reggio Emilia, Emilia-Romagna,  42124, Italy |
| Comitato Etico Aziende Sanitarie dell'Umbria, Segreteria Scientifico-Amministrativa, Via della Rivoluzione, 16, Ellera di Corciano (PG), Umbria, 6070, Italy |
| Comitato Etico Area 4 – ASL Brindisi, Segreteria Scientificoamministrativa, Via Napoli, 8, Brindisi, Puglia, 72100, Italy |
| Comitato Etico Univ. Studi Campania L.Vanvitelli – AOU L.Vanvitelli - AORN Osp. dei Colli, Sede AORN Ospedali dei Colli, Via Leonardo Bianchi snc, Napoli, Campania, 80131, Italy |
| Comitato Etico degli Istituti Clinici Scientifici Maugeri SpA – SB, Via Salvatore Maugeri 4, Pavia, Lombardia, 27100, Italy |
| Comitato Etico Campania Sud c/o ASL Napoli 3 Sud, Segreteria Scientifico-Amministrativa, Piazza San Giovanni, 7, Brusciano (NA), Campania, 80031, Italy |
| Hospital Real San José, Av Lázaro Cárdenas 4149 Colonia Jardines de San Ignacio, Zapopan, Jalisco, 45040, Mexico |
| Instituto Jalisciense de Investigación Clínica, S.A. de C.V., Penitenciaria 20, Guadalajara, Jalisco, 44100, Mexico |
| St. Antonius Ziekenhuis, Koekoekslaan 1, NIEUWEGEIN, 3435 CM, Netherlands |
| Pharma Ethics, 123 Amcor Road, Lyttelton Manor, 157, South Africa |
| University of Cape Town, Human Research Ethics Committee, Room E52.24, Old Main Building, Groote Schuur Hospital, Main Road, Observatory, 7925, South Africa |
| Fundació Unió Catalana d’Hospitals, 1ºA, C/Bruc 72-74, Barcelona, 8009, Spain |
| Regionala Etikprövningsnämnden I Göteborg, Guldhedsgatan 5A, GÖTEBORG, SE-413 20, Sweden |
| Advarra Institutional Review Board, Suite 110, 6940 Columbia Gateway Drive, Columbia, Maryland, 21046, United States |
| Saint Luke’s Hospital Institutional Review Board, 232 South Woods Mill Road, Chesterfield, Missouri, 63017, United States |
| South Carolina Pharmaceutical Research, 141 Harold Fleming Court, Spartanburg, South Carolina, 29303, United States |

EMAX, Early MAXimization of bronchodilation for improving COPD stability; IEC, independent ethics committee; IRB, institutional review board.

_
